# Supplementary material for: Highly recyclable polymer supported ionic liquids as efficient heterogeneous catalysts for batch and flow conversion of CO2 to cyclic carbonates
Source: Royal Society of Chemistry journal article supplement (doi:10.1039/c6ra26780g), 2017-01-01
Supplement: c6ra26780g1.pdf [file c6ra26780g1.pdf]

## Highly recyclable polymer supported ionic liquids as efficient heterogeneous catalysts for batch and flow conversion of CO<sub>2</sub> to cyclic carbonates

Tao Wang,<sup>ac</sup> Wenlong Wang,<sup>a</sup> Yuan Lyu,<sup>\*a</sup> Xingkun Chen,<sup>ac</sup> Cunyao Li,<sup>ac</sup> Yan Zhang,<sup>ac</sup> Xiangen Song,<sup>a</sup> and Yunjie Ding<sup>\*ab</sup>

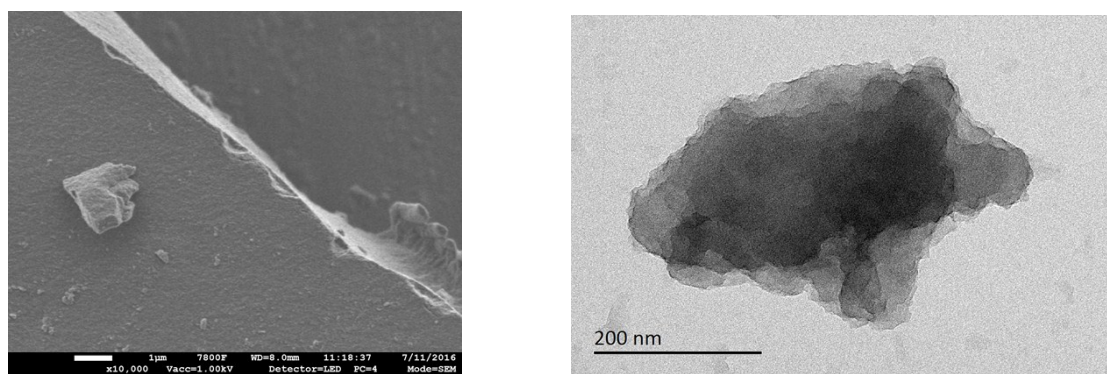

**Fig. S1** SEM image (left) and TEM image (right) of PSIL(IMD)-1.

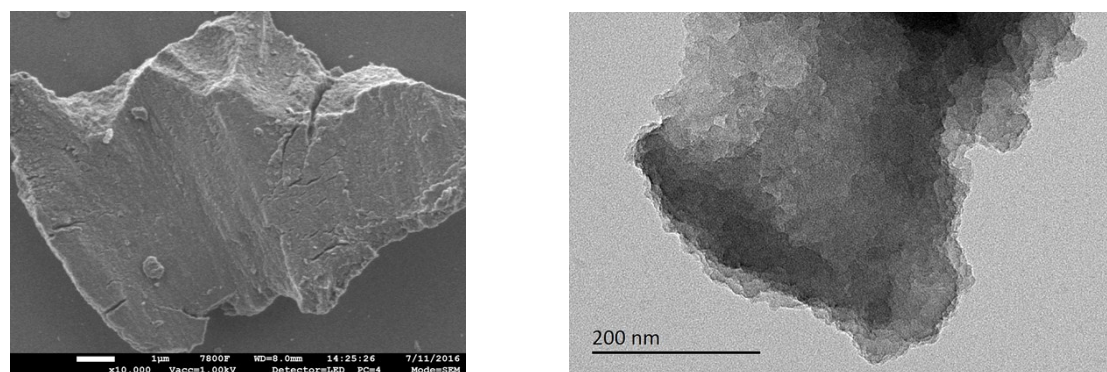

**Fig. S2** SEM image (left) and TEM image (right) of PSIL(IMD)-2.

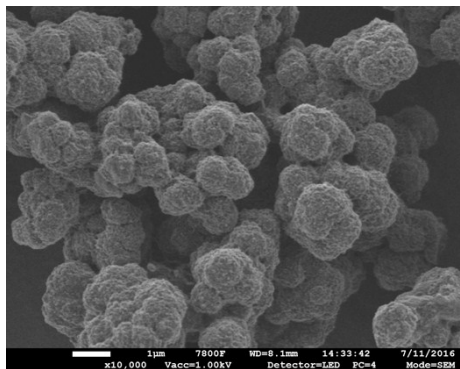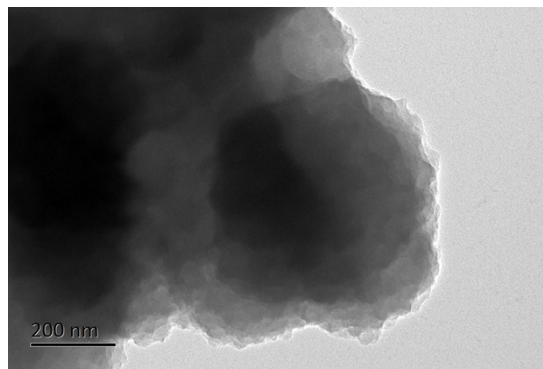

**Fig. S3** SEM image (left) and TEM image (right) of PSIL(TMA).

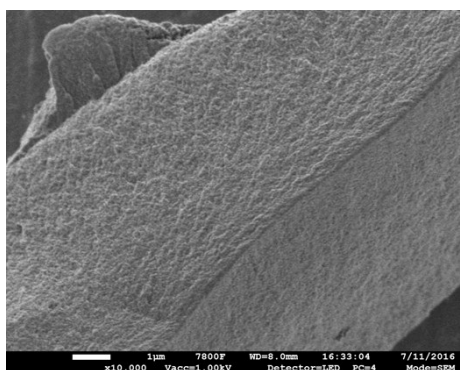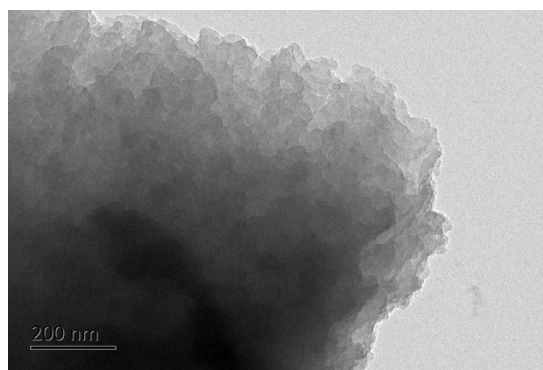

**Fig. S4** SEM image (left) and TEM image (right) of PSIL(TEA).

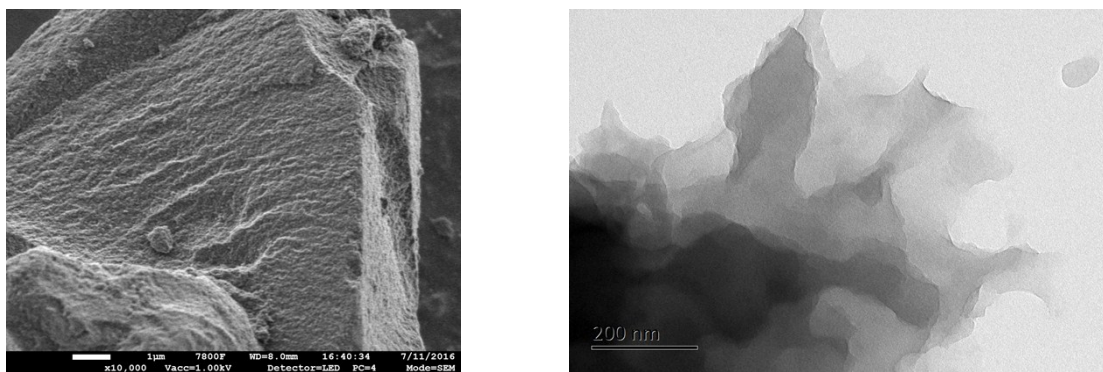

**Fig. S5** SEM image (left) and TEM image (right) of PSIL(TOA).

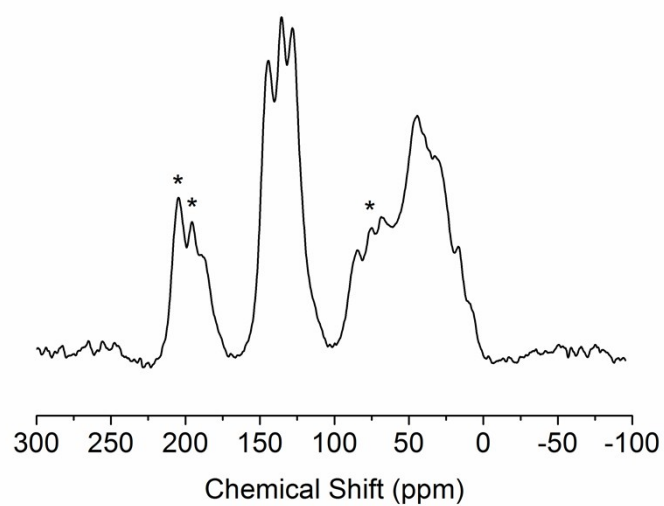

**Fig. S6** <sup>13</sup>C MAS NMR spectrum of PSIL(IMD)-2.

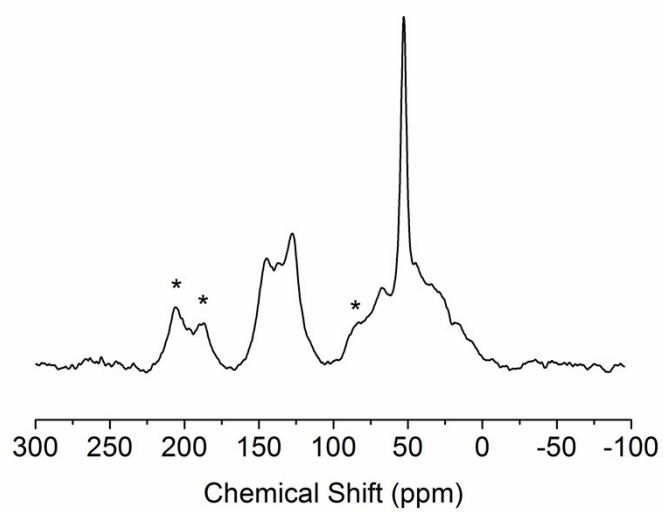

**Fig. S7**  $^{13}\text{C}$  MAS NMR spectrum of PSIL(TMA).

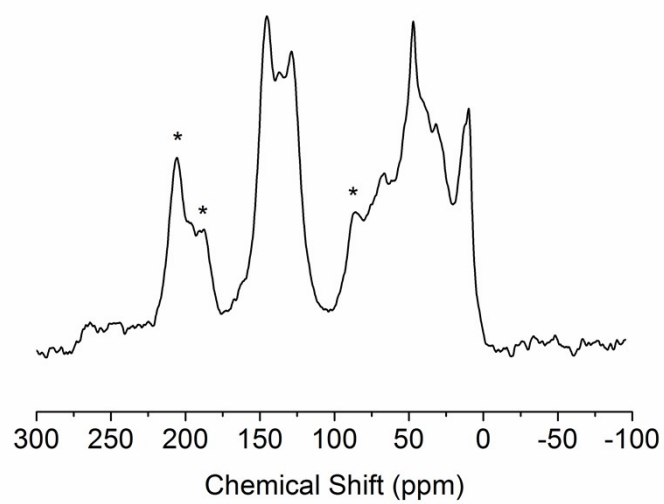

**Fig. S8**  $^{13}\text{C}$  MAS NMR spectrum of PSIL(TEA).

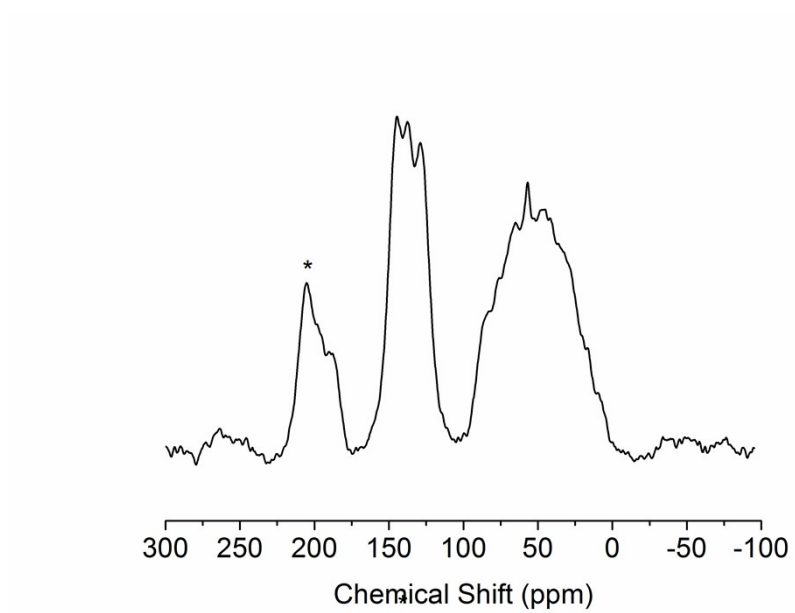

**Fig. S9**  $^{13}\text{C}$  MAS NMR spectrum of PSIL(TOA).
